# Supplementary material
Source: PubMed Central journal article supplement (PMC7159020)
Supplement: mmc1.pdf [file mmc1.pdf]

# THE LANCET

## Respiratory Medicine

### Supplementary appendix

This appendix formed part of the original submission and has been peer reviewed. We post it as supplied by the authors.

Supplement to: Zhang J, Zhou L, Yang Y, Peng W, Wang W, Chen X. Therapeutic and triage strategies for 2019 novel coronavirus disease in fever clinics. *Lancet Respir Med* 2020; published online Feb 13. [https://doi.org/10.1016/S2213-2600\(20\)30071-0](https://doi.org/10.1016/S2213-2600(20)30071-0).

## Appendix

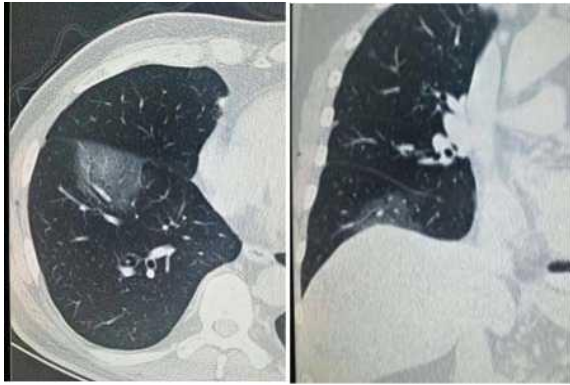

**Figure S1. Chest CT imaging of a patient with 2019 novel coronavirus disease**

57 years old Male. Chills at early stage with a low-grade fever to 37.5 ~ 37.7 °C after several days. Chest CT shows limited regional ground-glass opacity. Symptoms relieved after taking anti-Gram-positive antibiotic and Arbidol for 3 days. Then, lower respiratory tract secretions (sputum) was tested and confirmed to be severe acute respiratory 2 (SARS-CoV-2) positive
